# Supplementary material for: Assessing Anthocyanin Biosynthesis in Solanaceae as a Model Pathway for Secondary Metabolism
Source: MDPI journal article supplement (doi:10.3390/genes10080559), 2019-07-25
Supplement: s1 [file s1]

**Table S1. Sources of coding sequence annotations**

| Group       | Order        | Species                          | Abbreviation | Version          | Source                    |
|-------------|--------------|----------------------------------|--------------|------------------|---------------------------|
| lamiids     | Gentianales  | <i>Coffea canephora</i>          | Cocan        | Ccanephora       | solgenomics.net           |
| lamiids     | Lamiales     | <i>Mimulus guttatus</i>          | Migut        | Mimgu1_0         | ncbi.nlm.nih.gov/assembly |
| lamiids     | Lamiales     | <i>Mimulus guttatus</i>          | Migut        | v2.0             | phytozome.jgi.doe.gov     |
| lamiids     | Lamiales     | <i>Olea europaea</i>             | Oleur        | O_europaea_v1    | ncbi.nlm.nih.gov/assembly |
| lamiids     | Lamiales     | <i>Olea europaea</i>             | Oleur        | v1.0             | phytozome.jgi.doe.gov     |
| lamiids     | Lamiales     | <i>Sesamum indicum</i>           | Seind        | S_indicum_v1.0   | ncbi.nlm.nih.gov/assembly |
| lamiids     | Lamiales     | <i>Sesamum indicum</i>           | Seind        | v1.0             | ocri-genomics.org/Sinbase |
| lamiids     | Solanales    | <i>Capsicum annuum</i>           | Caann        | Zunla_1_Ref_v1.0 | ncbi.nlm.nih.gov/assembly |
| lamiids     | Solanales    | <i>Capsicum annuum</i>           | Caann        | CM334 v.1.55     | solgenomics.net           |
| lamiids     | Solanales    | <i>Ipomoea nil</i>               | Ipnil        | Asagao_1.1       | ncbi.nlm.nih.gov/assembly |
| lamiids     | Solanales    | <i>Ipomoea nil</i>               | Ipnil        | Asagao_1.2       | viewer.shigen.info/asagao |
| lamiids     | Solanales    | <i>Nicotiana glauca</i>          | Nisyl        | Nsyl             | ncbi.nlm.nih.gov/assembly |
| lamiids     | Solanales    | <i>Nicotiana glauca</i>          | Nisyl        | Nsyl_ASAF01      | solgenomics.net           |
| lamiids     | Solanales    | <i>Nicotiana tabacum</i>         | Nitab        | Ntab-TN90        | ncbi.nlm.nih.gov/assembly |
| lamiids     | Solanales    | <i>Nicotiana tabacum</i>         | Nitab        | v4.5             | solgenomics.net           |
| lamiids     | Solanales    | <i>Nicotiana tomentosiformis</i> | Nitom        | Ntom_v01         | ncbi.nlm.nih.gov/assembly |
| lamiids     | Solanales    | <i>Nicotiana tomentosiformis</i> | Nitom        | Ntom_ASAG01      | solgenomics.net           |
| lamiids     | Solanales    | <i>Petunia axillaris</i>         | Peaxi        | v1.6.2           | solgenomics.net           |
| lamiids     | Solanales    | <i>Solanum lycopersicum</i>      | Solyc        | SL3.0            | ncbi.nlm.nih.gov/assembly |
| lamiids     | Solanales    | <i>Solanum lycopersicum</i>      | Solyc        | ITAG3.2          | solgenomics.net           |
| lamiids     | Solanales    | <i>Solanum pennellii</i>         | Sopen        | SPENNV200        | ncbi.nlm.nih.gov/assembly |
| lamiids     | Solanales    | <i>Solanum pennellii</i>         | Sopen        | v2               | solgenomics.net           |
| lamiids     | Solanales    | <i>Solanum tuberosum</i>         | Sotub        | SolTub_3.0       | ncbi.nlm.nih.gov/assembly |
| lamiids     | Solanales    | <i>Solanum tuberosum</i>         | Sotub        | v4.03            | phytozome.jgi.doe.gov     |
| campanulids | Apiales      | <i>Daucus carota</i>             | Dacar        | ASM162521v1      | ncbi.nlm.nih.gov/assembly |
| campanulids | Apiales      | <i>Daucus carota</i>             | Dacar        | v2.0             | phytozome.jgi.doe.gov     |
| campanulids | Asterales    | <i>Cynara cardunculus</i>        | Cycar        | CcrdV1           | ncbi.nlm.nih.gov/assembly |
| campanulids | Asterales    | <i>Helianthus annuus</i>         | Heann        | HanXRQr1.0       | ncbi.nlm.nih.gov/assembly |
| campanulids | Asterales    | <i>Helianthus annuus</i>         | Heann        | r1.2             | phytozome.jgi.doe.gov     |
| campanulids | Asterales    | <i>Lactuca sativa</i>            | Lasat        | Lsat_Salinas_v7  | ncbi.nlm.nih.gov/assembly |
| campanulids | Asterales    | <i>Lactuca sativa</i>            | Lasat        | v5               | phytozome.jgi.doe.gov     |
| rosids      | Brassicales  | <i>Arabidopsis thaliana</i>      | Artha        | TAIR10           | ncbi.nlm.nih.gov/assembly |
| rosids      | Brassicales  | <i>Arabidopsis thaliana</i>      | Artha        | TAIR10           | phytozome.jgi.doe.gov     |
| rosids      | Fabales      | <i>Medicago truncatula</i>       | Metru        | MedtrA17_4.0     | ncbi.nlm.nih.gov/assembly |
| rosids      | Fabales      | <i>Medicago truncatula</i>       | Metru        | Mt4.0v1          | phytozome.jgi.doe.gov     |
| rosids      | Malpighiales | <i>Populus trichocarpa</i>       | Potri        | Pop_tri_v3       | ncbi.nlm.nih.gov/assembly |
| rosids      | Malpighiales | <i>Populus trichocarpa</i>       | Potri        | v3.0             | phytozome.jgi.doe.gov     |
| rosids      | Vitales      | <i>Vitis vinifera</i>            | Vivin        | 12X              | ncbi.nlm.nih.gov/assembly |
| rosids      | Vitales      | <i>Vitis vinifera</i>            | Vivin        | 12X              | phytozome.jgi.doe.gov     |

**Table S2. Comparison of anthocyanin biosynthesis genes from NCBI and genome-specific annotations**

| Gene   | Species | NCBI Annotation             |        | Genome-specific Annotation |        | Perc ID | Classification |
|--------|---------|-----------------------------|--------|----------------------------|--------|---------|----------------|
|        |         | Gene                        | Length | Gene                       | Length |         |                |
| ANS    | Artha   | AT4G22870.1                 | 339    | <b>AT4G22870.2</b>         | 462    | 100.0   | Imperfect RBH  |
| ANS    | Artha   | <b>AT4G22880.1</b>          | 1071   | AT4G22880.1                | 1071   | 100.0   | Perfect RBH    |
| CHI    | Artha   | <b>AT3G55120.1</b>          | 741    | AT3G55120.1                | 741    | 100.0   | Perfect RBH    |
| CHI    | Artha   | <b>AT5G66220.1</b>          | 525    | AT5G66220.1                | 525    | 100.0   | Perfect RBH    |
| CHS    | Artha   | <b>AT5G13930.1</b>          | 1188   | AT5G13930.1                | 1188   | 100.0   | Perfect RBH    |
| DFR    | Artha   | <b>AT5G42800.1</b>          | 1149   | AT5G42800.1                | 1149   | 100.0   | Perfect RBH    |
| F3'H   | Artha   | <b>AT5G07990.1</b>          | 1542   | AT5G07990.1                | 1542   | 100.0   | Perfect RBH    |
| F3H    | Artha   | <b>AT3G51240.1</b>          | 1077   | AT3G51240.1                | 1077   | 100.0   | Perfect RBH    |
| ANS    | Caann   | <b>Caann_XM_016712446.1</b> | 1287   | Cannu_CA01g03670           | 1287   | 99.5    | Imperfect RBH  |
| CHI    | Caann   | <b>Caann_XM_016697793.1</b> | 699    | Cannu_CA11g02280           | 612    | 99.7    | Imperfect RBH  |
| CHS    | Caann   | -                           | -      | <b>Cannu_CA00g90780</b>    | 390    | -       | No RBH         |
| CHS    | Caann   | -                           | -      | <b>Cannu_CA05g17040</b>    | 741    | -       | No RBH         |
| CHS    | Caann   | <b>Caann_XM_016694194.1</b> | 1212   | Cannu_CA12g20070           | 1011   | 99.6    | Imperfect RBH  |
| CHS    | Caann   | <b>Caann_XM_016695870.1</b> | 1173   | Cannu_CA00g90800           | 1173   | 100.0   | Perfect RBH    |
| CHS    | Caann   | <b>Caann_XM_016695871.1</b> | 1170   | Cannu_CA00g90790           | 984    | 99.8    | Imperfect RBH  |
|        |         |                             |        | Cannu_CA12g20050 +         |        |         |                |
| CHS    | Caann   | <b>Caann_XM_016696552.1</b> | 1158   | Cannu_CA12g20060           | 1053   | 88.4    | cluster BH     |
| CHS    | Caann   | <b>Caann_XM_016710598.1</b> | 1170   | Cannu_CA03g02050           | 1170   | 99.9    | Imperfect RBH  |
| CHS    | Caann   | <b>Caann_XM_016718115.1</b> | 1179   | -                          | -      | -       | No RBH         |
| CHS    | Caann   | <b>Caann_XM_016718139.1</b> | 1209   | Cannu_CA05g17060           | 1209   | 99.8    | Imperfect RBH  |
| CHS    | Caann   | <b>Caann_XM_016726963.1</b> | 798    | Cannu_CA08g19650           | 798    | 100.0   | Perfect RBH    |
| DFR    | Caann   | <b>Caann_XM_016705224.1</b> | 1236   | Cannu_CA02g22270           | 1101   | 100.0   | Imperfect RBH  |
| F3'5'H | Caann   | <b>Caann_XM_016691378.1</b> | 1536   | -                          | -      | -       | No RBH         |
| F3'5'H | Caann   | <b>Caann_XM_016693437.1</b> | 1542   | Cannu_CA11g18550           | 1374   | 99.9    | Imperfect RBH  |
| F3'H   | Caann   | <b>Caann_XM_016707872.1</b> | 1542   | Cannu_CA03g29350           | 1257   | 98.9    | Imperfect RBH  |
| F3H    | Caann   | -                           | -      | <b>Cannu_CA02g21520</b>    | 546    | -       | No RBH         |
| F3H    | Caann   | <b>Caann_XM_016705025.1</b> | 1098   | Cannu_CA02g21550           | 1101   | 99.7    | Imperfect RBH  |
| ANS    | Cocan   | -                           | -      | <b>Ccan_Cc08_g13720</b>    | -      | -       | No RBH         |
| CHI    | Cocan   | -                           | -      | <b>Ccan_Cc02_g08570</b>    | -      | -       | No RBH         |
| CHS    | Cocan   | -                           | -      | <b>Ccan_Cc00_g19010</b>    | -      | -       | No RBH         |
| CHS    | Cocan   | -                           | -      | <b>Ccan_Cc00_g32030</b>    | -      | -       | No RBH         |
| DFR    | Cocan   | -                           | -      | <b>Ccan_Cc07_g09810</b>    | -      | -       | No RBH         |
| F3'H   | Cocan   | -                           | -      | <b>Ccan_Cc00_g07110</b>    | -      | -       | No RBH         |
| F3'H   | Cocan   | -                           | -      | <b>Ccan_Cc00_g07120</b>    | -      | -       | No RBH         |
| F3'H   | Cocan   | -                           | -      | <b>Ccan_Cc02_g28860</b>    | -      | -       | No RBH         |
| F3'H   | Cocan   | -                           | -      | <b>Ccan_Cc02_g28870</b>    | -      | -       | No RBH         |
| F3'H   | Cocan   | -                           | -      | <b>Ccan_Cc04_g13260</b>    | -      | -       | No RBH         |
| F3H    | Cocan   | -                           | -      | <b>Ccan_Cc07_g10740</b>    | -      | -       | No RBH         |
| ANS    | Cycar   | <b>Cycar_XM_025103808.1</b> | -      | -                          | -      | -       | No RBH         |
| CHI    | Cycar   | <b>Cycar_XM_025113756.1</b> | -      | -                          | -      | -       | No RBH         |
| CHI    | Cycar   | <b>Cycar_XM_025114537.1</b> | -      | -                          | -      | -       | No RBH         |
| CHS    | Cycar   | <b>Cycar_XM_025115139.1</b> | -      | -                          | -      | -       | No RBH         |
| CHS    | Cycar   | <b>Cycar_XM_025115340.1</b> | -      | -                          | -      | -       | No RBH         |
| CHS    | Cycar   | <b>Cycar_XM_025117980.1</b> | -      | -                          | -      | -       | No RBH         |
| CHS    | Cycar   | <b>Cycar_XM_025124791.1</b> | -      | -                          | -      | -       | No RBH         |
| CHS    | Cycar   | <b>Cycar_XM_025126676.1</b> | -      | -                          | -      | -       | No RBH         |
| CHS    | Cycar   | <b>Cycar_XM_025126677.1</b> | -      | -                          | -      | -       | No RBH         |
| DFR    | Cycar   | <b>Cycar_XM_025113289.1</b> | -      | -                          | -      | -       | No RBH         |
| F3'H   | Cycar   | <b>Cycar_XM_025120904.1</b> | -      | -                          | -      | -       | No RBH         |
| F3H    | Cycar   | <b>Cycar_XM_025118318.1</b> | -      | -                          | -      | -       | No RBH         |
| ANS    | Dacar   | <b>Dacar_XM_017380613.1</b> | 1209   | DCAR_006772                | 1209   | 100.0   | Perfect RBH    |
| CHI    | Dacar   | <b>Dacar_XM_017365109.1</b> | 879    | DCAR_027694                | 663    | 100.0   | Imperfect RBH  |
| CHS    | Dacar   | <b>Dacar_XM_017360477.1</b> | 1176   | DCAR_026111                | 1176   | 100.0   | Perfect RBH    |
| CHS    | Dacar   | <b>Dacar_XM_017364131.1</b> | 1176   | DCAR_026110                | 921    | 99.4    | cluster BH     |
| CHS    | Dacar   | <b>Dacar_XM_017368840.1</b> | 1170   | DCAR_030786                | 1170   | 100.0   | Perfect RBH    |
| CHS    | Dacar   | <b>Dacar_XM_017371435.1</b> | 1173   | DCAR_030785                | 762    | 100.0   | Imperfect RBH  |
| CHS    | Dacar   | <b>Dacar_XM_017372560.1</b> | 453    | DCAR_000081                | 465    | 100.0   | Imperfect RBH  |
| CHS    | Dacar   | <b>Dacar_XM_017384350.1</b> | 753    | -                          | -      | -       | No RBH         |

|      |       |                      |      |                     |      |       |               |
|------|-------|----------------------|------|---------------------|------|-------|---------------|
| CHS  | Dacar | Dacar_XM_017388617.1 | 1176 | DCAR_014462         | 774  | 100.0 | Imperfect RBH |
| CHS  | Dacar | Dacar_XM_017394258.1 | 1179 | DCAR_018997         | 1179 | 100.0 | Perfect RBH   |
| CHS  | Dacar | Dacar_XM_017395620.1 | 495  | -                   | -    | -     | No RBH        |
| CHS  | Dacar | Dacar_XM_017396858.1 | 1233 | DCAR_018999         | 1197 | 100.0 | cluster BH    |
| CHS  | Dacar | Dacar_XM_017396859.1 | 1233 | DCAR_019001         | 1197 | 100.0 | Imperfect RBH |
| CHS  | Dacar | Dacar_XM_017396860.1 | 1179 | DCAR_019002         | 1179 | 100.0 | Imperfect RBH |
| CHS  | Dacar | Dacar_XM_017397154.1 | 1194 | DCAR_018992         | 1128 | 100.0 | cluster BH    |
| DFR  | Dacar | Dacar_XM_017389661.1 | 1014 | DCAR_013832         | 1014 | 100.0 | Perfect RBH   |
| DFR  | Dacar | Dacar_XM_017394438.1 | 1008 | DCAR_017533         | 813  | 97.7  | cluster BH    |
|      |       | Dacar_XM_017395352.1 |      |                     |      |       |               |
| DFR  | Dacar | split1               | 1005 | DCAR_017529         | 1005 | 100.0 | Imperfect RBH |
|      |       | Dacar_XM_017395352.1 |      |                     |      |       |               |
| DFR  | Dacar | split2               | 1005 | DCAR_017530         | 1005 | 98.3  | Imperfect RBH |
| DFR  | Dacar | Dacar_XM_017396019.1 | 1014 | DCAR_017528         | 1008 | 100.0 | Imperfect RBH |
| DFR  | Dacar | Dacar_XM_017396664.1 | 1044 | -                   | -    | -     | No RBH        |
| DFR  | Dacar | Dacar_XM_017396665.1 | 1002 | DCAR_017531         | 1014 | 97.5  | Imperfect RBH |
| DFR  | Dacar | Dacar_XM_017398898.1 | 1056 | DCAR_022969         | 1056 | 100.0 | Perfect RBH   |
| DFR  | Dacar | Dacar_XM_017399501.1 | 1143 | DCAR_021485         | 1140 | 99.7  | Imperfect RBH |
| F3'H | Dacar | Dacar_XM_017388905.1 | 1551 | DCAR_014032         | 1356 | 100.0 | Imperfect RBH |
| F3H  | Dacar | Dacar_XM_017383706.1 | 936  | DCAR_009487         | 699  | 100.0 | Imperfect RBH |
| F3H  | Dacar | Dacar_XM_017385170.1 | 1149 | DCAR_009488         | 711  | 100.0 | Imperfect RBH |
| F3H  | Dacar | Dacar_XM_017385173.1 | 1101 | DCAR_009483         | 828  | 100.0 | Imperfect RBH |
| F3H  | Dacar | Dacar_XM_017385175.1 | 1074 | DCAR_009489         | 726  | 100.0 | Imperfect RBH |
| ANS  | Heann | Heann_XM_022177923.1 | 1083 | HanXRQChr04g0095451 | 1134 | 100.0 | Imperfect RBH |
| ANS  | Heann | Heann_XM_022177924.1 | 1068 | HanXRQChr04g0095471 | 1068 | 100.0 | Perfect RBH   |
| CHI  | Heann | Heann_XM_022155533.1 | 684  | HanXRQChr15g0496901 | 669  | 100.0 | Imperfect RBH |
| CHI  | Heann | Heann_XM_022157901.1 | 672  | HanXRQChr15g0496871 | 672  | 100.0 | Perfect RBH   |
| CHI  | Heann | Heann_XM_022157902.1 | 666  | HanXRQChr15g0496881 | 666  | 100.0 | Perfect RBH   |
| CHS  | Heann | Heann_XM_022127208.1 | 1227 | HanXRQChr09g0260921 | 1227 | 100.0 | Perfect RBH   |
| CHS  | Heann | Heann_XM_022127919.1 | 1365 | HanXRQChr09g0267961 | 1386 | 100.0 | Imperfect RBH |
| CHS  | Heann | Heann_XM_022136927.1 | 1212 | HanXRQChr11g0324891 | 1212 | 100.0 | Perfect RBH   |
| CHS  | Heann | Heann_XM_022136928.1 | 1299 | HanXRQChr11g0324921 | 1239 | 100.0 | Imperfect RBH |
| CHS  | Heann | Heann_XM_022136929.1 | 1224 | HanXRQChr11g0324941 | 960  | 100.0 | Imperfect RBH |
| CHS  | Heann | Heann_XM_022136930.1 | 609  | HanXRQChr11g0324911 | 579  | 100.0 | Imperfect RBH |
| CHS  | Heann | Heann_XM_022142672.1 | 1209 | HanXRQChr12g0375361 | 1209 | 100.0 | Perfect RBH   |
| CHS  | Heann | Heann_XM_022153962.1 | 1197 | HanXRQChr14g0440901 | 1344 | 100.0 | Imperfect RBH |
| CHS  | Heann | Heann_XM_022153975.1 | 1197 | HanXRQChr14g0441041 | 1197 | 100.0 | Perfect RBH   |
| CHS  | Heann | Heann_XM_022161268.1 | 1236 | HanXRQChr16g0508841 | 1335 | 100.0 | Imperfect RBH |
| CHS  | Heann | Heann_XM_022178725.1 | 1197 | HanXRQChr04g0106111 | 1197 | 100.0 | Perfect RBH   |
| CHS  | Heann | Heann_XM_022179491.1 | 1170 | HanXRQChr04g0114951 | 1254 | 100.0 | cluster BH    |
| CHS  | Heann | Heann_XM_022179492.1 | 1170 | HanXRQChr04g0114941 | 1170 | 100.0 | Perfect RBH   |
| DFR  | Heann | Heann_XM_022145746.1 | 1068 | HanXRQChr13g0407201 | 1068 | 100.0 | Perfect RBH   |
| F3'H | Heann | Heann_XM_022119664.1 | 705  | HanXRQChr08g0233711 | 543  | 100.0 | Imperfect RBH |
| F3'H | Heann | Heann_XM_022122577.1 | 1539 | HanXRQChr08g0233771 | 1617 | 100.0 | Imperfect RBH |
| F3'H | Heann | Heann_XM_022124823.1 | 504  | HanXRQChr09g0266651 | 423  | 100.0 | Imperfect RBH |
| F3'H | Heann | Heann_XM_022153126.1 | 1518 | HanXRQChr14g0430831 | 1518 | 100.0 | Perfect RBH   |
| F3'H | Heann | Heann_XM_022153244.1 | 1539 | HanXRQChr14g0432191 | 1539 | 100.0 | Perfect RBH   |
| F3H  | Heann | Heann_XM_022160179.1 | 1095 | HanXRQChr16g0531451 | 1095 | 100.0 | Perfect RBH   |
| ANS  | Ipnil | Ipnil_XM_019317185.1 | 1116 | INIL13g40254.t1     | 1116 | 100.0 | Perfect RBH   |
| CHI  | Ipnil | Ipnil_XM_019337142.1 | 726  | INIL11g18443.t1     | 726  | 100.0 | Perfect RBH   |
| CHS  | Ipnil | -                    | -    | INIL11g18930.t1     | 1191 | -     | No RBH        |
| CHS  | Ipnil | Ipnil_XM_019310063.1 | 1170 | INIL14g35461.t1     | 1170 | 100.0 | Perfect RBH   |
| CHS  | Ipnil | Ipnil_XM_019326011.1 | 1167 | INIL12g08537.t1     | 1167 | 100.0 | Perfect RBH   |
| CHS  | Ipnil | Ipnil_XM_019339953.1 | 1191 | INIL11g18928.t1     | 1191 | 100.0 | Perfect RBH   |
| CHS  | Ipnil | Ipnil_XM_019339957.1 | 1182 | INIL11g18931.t1     | 1182 | 100.0 | Perfect RBH   |
| CHS  | Ipnil | Ipnil_XM_019339958.1 | 1134 | INIL11g18926.t1     | 1134 | 100.0 | Perfect RBH   |
| DFR  | Ipnil | Ipnil_XM_019327016.1 | 1074 | INIL05g09558.t1     | 1044 | 100.0 | Imperfect RBH |
| DFR  | Ipnil | Ipnil_XM_019327030.1 | 1212 | INIL05g09559.t1     | 1212 | 100.0 | Perfect RBH   |
| DFR  | Ipnil | Ipnil_XM_019327031.1 | 1071 | INIL05g09560.t1     | 1071 | 100.0 | Perfect RBH   |
| F3'H | Ipnil | Ipnil_XM_019308867.1 | 1560 | INIL04g34064.t1     | 756  | 100.0 | Imperfect RBH |
| F3H  | Ipnil | Ipnil_XM_019316832.1 | 1101 | INIL02g39928.t1     | 1077 | 97.8  | Imperfect RBH |

|        |       |                      |      |                         |      |       |               |
|--------|-------|----------------------|------|-------------------------|------|-------|---------------|
| F3H    | Ipnil | Ipnil_XM_019316833.1 | 1002 | INIL02g39929.t1         | 1002 | 100.0 | Perfect RBH   |
| F3H    | Ipnil | Ipnil_XM_019327227.1 | 1086 | INIL05g09512.t1         | 1086 | 100.0 | Perfect RBH   |
| ANS    | Lasat | -                    | -    | Lsat_1_v5_gn_9_97280.1  | 681  | -     | No RBH        |
| CHI    | Lasat | Lasat_XM_023891334.1 | 708  | Lsat_1_v5_gn_9_66221.1  | 708  | 100.0 | Perfect RBH   |
| CHS    | Lasat | -                    | -    | Lsat_1_v5_gn_2_42901.1  | 531  | -     | No RBH        |
| CHS    | Lasat | Lasat_XM_023878437.1 | 1170 | Lsat_1_v5_gn_2_42860.1  | 1170 | 100.0 | Perfect RBH   |
| CHS    | Lasat | Lasat_XM_023878440.1 | 1170 | Lsat_1_v5_gn_2_43721.1  | 1161 | 100.0 | Imperfect RBH |
| CHS    | Lasat | Lasat_XM_023878441.1 | 1170 | -                       | -    | -     | No RBH        |
| CHS    | Lasat | Lasat_XM_023878447.1 | 1176 | Lsat_1_v5_gn_2_42881.1  | 1170 | 100.0 | Imperfect RBH |
| CHS    | Lasat | Lasat_XM_023878452.1 | 1200 | Lsat_1_v5_gn_2_43780.1  | 1170 | 100.0 | Imperfect RBH |
| CHS    | Lasat | Lasat_XM_023878453.1 | 1152 | Lsat_1_v5_gn_2_43681.1  | 1152 | 100.0 | Perfect RBH   |
| CHS    | Lasat | Lasat_XM_023878454.1 | 1185 | Lsat_1_v5_gn_2_42941.1  | 1170 | 100.0 | Imperfect RBH |
| CHS    | Lasat | Lasat_XM_023879789.1 | 1200 | Lsat_1_v5_gn_2_76880.1  | 1197 | 100.0 | Imperfect RBH |
| CHS    | Lasat | Lasat_XM_023897706.1 | 1215 | Lsat_1_v5_gn_4_147220.1 | 1215 | 100.0 | Perfect RBH   |
| DFR    | Lasat | Lasat_XM_023893302.1 | 1062 | Lsat_1_v5_gn_2_77261.1  | 1062 | 100.0 | Perfect RBH   |
| F3'H   | Lasat | Lasat_XM_023887166.1 | 1539 | Lsat_1_v5_gn_5_23101.1  | 1539 | 100.0 | Perfect RBH   |
| F3'H   | Lasat | Lasat_XM_023904089.1 | 1557 | Lsat_1_v5_gn_5_22780.1  | 1551 | 100.0 | Imperfect RBH |
| F3H    | Lasat | Lasat_XM_023893557.1 | 1095 | Lsat_1_v5_gn_3_74560.1  | 1095 | 100.0 | Perfect RBH   |
| ANS    | Metru | Metru_XM_003611141.2 | 1071 | Medtr5g011250.1         | 1071 | 100.0 | Perfect RBH   |
| CHI    | Metru | Metru_XM_003592713.2 | 669  | Medtr1g115820.1         | 669  | 100.0 | Perfect RBH   |
| CHI    | Metru | Metru_XM_003592715.2 | 678  | Medtr1g115840.1         | 678  | 100.0 | Perfect RBH   |
| CHI    | Metru | Metru_XM_003592718.2 | 675  | Medtr1g115870.1         | 675  | 100.0 | Perfect RBH   |
| CHI    | Metru | Metru_XM_003592720.2 | 681  | Medtr1g115890.1         | 681  | 100.0 | Perfect RBH   |
| CHI    | Metru | Metru_XM_013592455.1 | 465  | Medtr7g027135.1         | 465  | 100.0 | Perfect RBH   |
| CHI    | Metru | Metru_XM_013615033.1 | 693  | Medtr1g115850.2         | 693  | 100.0 | Perfect RBH   |
| CHS    | Metru | Metru_XM_003591974.2 | 1269 | Medtr1g097910.1         | 1170 | 100.0 | Imperfect RBH |
| CHS    | Metru | Metru_XM_003591996.2 | 1170 | Medtr1g098140.1         | 1170 | 100.0 | Perfect RBH   |
| CHS    | Metru | Metru_XM_003595597.2 | 1170 | Medtr2g058470.1         | 1170 | 100.0 | Perfect RBH   |
| CHS    | Metru | Metru_XM_003601599.2 | 1170 | Medtr3g083910.1         | 1170 | 100.0 | Perfect RBH   |
| CHS    | Metru | Metru_XM_003601600.2 | 1170 | Medtr3g083920.1         | 1170 | 100.0 | Perfect RBH   |
| CHS    | Metru | Metru_XM_003601819.2 | 1170 | Medtr3g086260.1         | 1170 | 100.0 | Perfect RBH   |
| CHS    | Metru | Metru_XM_003610804.2 | 1170 | Medtr5g007730.1         | 1170 | 100.0 | Perfect RBH   |
| CHS    | Metru | Metru_XM_003610805.2 | 981  | Medtr5g007740.1         | 981  | 100.0 | Perfect RBH   |
| CHS    | Metru | Metru_XM_003610807.2 | 1170 | Medtr5g007760.1         | 1170 | 100.0 | Perfect RBH   |
| CHS    | Metru | Metru_XM_003610808.1 | 810  | Medtr5g007770.1         | 810  | 100.0 | Perfect RBH   |
| CHS    | Metru | Metru_XM_003621482.2 | 1170 | Medtr7g016700.1         | 1170 | 100.0 | Perfect RBH   |
| CHS    | Metru | Metru_XM_003621484.2 | 1170 | Medtr7g016720.1         | 1170 | 100.0 | Perfect RBH   |
| CHS    | Metru | Metru_XM_003621486.1 | 1170 | Medtr7g016780.1         | 1170 | 100.0 | Perfect RBH   |
| CHS    | Metru | Metru_XM_003621488.1 | 1170 | Medtr7g016800.1         | 1170 | 100.0 | Perfect RBH   |
| CHS    | Metru | Metru_XM_003621490.2 | 1170 | Medtr7g016820.1         | 1170 | 100.0 | Perfect RBH   |
| CHS    | Metru | Metru_XM_003624476.2 | 1176 | Medtr7g084300.1         | 1176 | 100.0 | Perfect RBH   |
| CHS    | Metru | Metru_XM_013595036.1 | 912  | Medtr7g113405.1         | 912  | 100.0 | Perfect RBH   |
| CHS    | Metru | Metru_XM_013597892.1 | 1242 | Medtr5g007713.1         | 1170 | 100.0 | Imperfect RBH |
| CHS    | Metru | Metru_XM_013597893.1 | 1170 | Medtr5g007717.1         | 1170 | 100.0 | Perfect RBH   |
| CHS    | Metru | Metru_XM_013597894.1 | 1197 | Medtr5g007723.1         | 1197 | 100.0 | Perfect RBH   |
| CHS    | Metru | Metru_XM_013605871.1 | 1230 | Medtr3g088670.1         | 1179 | 100.0 | Imperfect RBH |
| CHS    | Metru | Metru_XM_013605872.1 | 1182 | Medtr3g088675.1         | 1182 | 100.0 | Perfect RBH   |
| CHS    | Metru | Metru_XM_013614150.1 | 1272 | Medtr1g097935.1         | 1170 | 100.0 | Imperfect RBH |
| DFR    | Metru | Metru_XM_013610679.1 | 1020 | Medtr1g022440.1         | 1020 | 100.0 | Perfect RBH   |
| DFR    | Metru | Metru_XM_013610680.1 | 1005 | Medtr1g022445.1         | 1005 | 100.0 | Perfect RBH   |
| F3'5'H | Metru | Metru_XM_013603872.1 | 1548 | Medtr3g436390.1         | 1521 | 100.0 | Imperfect RBH |
| F3'5'H | Metru | Metru_XM_013603876.1 | 1548 | Medtr3g436540.1         | 1548 | 100.0 | Perfect RBH   |
| F3'H   | Metru | Metru_XM_003598897.2 | 1551 | Medtr3g025230.1         | 1551 | 100.0 | Perfect RBH   |
| F3'H   | Metru | Metru_XM_003598899.1 | 861  | Medtr3g025250.1         | 861  | 100.0 | Perfect RBH   |
| F3'H   | Metru | Metru_XM_003598900.2 | 1551 | Medtr3g025260.1         | 1551 | 100.0 | Perfect RBH   |
| F3'H   | Metru | Metru_XM_013602525.1 | 1533 | Medtr4g109470.1         | 1533 | 100.0 | Perfect RBH   |
| F3'H   | Metru | Metru_XM_013603646.1 | 1551 | Medtr3g024520.1         | 1551 | 100.0 | Perfect RBH   |
| F3H    | Metru | Metru_XM_003612118.2 | 1074 | Medtr5g022020.1         | 1074 | 100.0 | Perfect RBH   |
| F3H    | Metru | Metru_XM_003629272.2 | 1098 | Medtr8g075830.1         | 1098 | 100.0 | Perfect RBH   |
| F3H    | Metru | Metru_XM_003629275.2 | 1098 | Medtr8g075890.1         | 1098 | 100.0 | Perfect RBH   |
| F3H    | Metru | Metru_XM_013604559.1 | 1065 | Medtr3g058610.1         | 1065 | 100.0 | Perfect RBH   |

|        |       |                      |      |                         |      |       |               |
|--------|-------|----------------------|------|-------------------------|------|-------|---------------|
| ANS    | Migut | Migut_XM_012991981.1 | 1161 | Migut.E01023.1          | 1182 | 100.0 | Imperfect RBH |
| CHI    | Migut | Migut_XM_012978000.1 | 756  | Migut.D00159.1          | 720  | 100.0 | Imperfect RBH |
| CHI    | Migut | Migut_XM_012982352.1 | 531  | -                       | -    | -     | No RBH        |
| CHS    | Migut | Migut_XM_012973820.1 | 1179 | Migut.G00627.1          | 1179 | 100.0 | Perfect RBH   |
| CHS    | Migut | Migut_XM_012973831.1 | 1173 | Migut.G00628.1          | 1173 | 100.0 | Perfect RBH   |
| CHS    | Migut | Migut_XM_012982223.1 | 501  | Migut.B01017.1          | 504  | 100.0 | Imperfect RBH |
| CHS    | Migut | Migut_XM_012988049.1 | 501  | Migut.H00487.1          | 579  | 100.0 | cluster BH    |
| CHS    | Migut | Migut_XM_012988726.1 | 1164 | Migut.G00629.1          | 1080 | 100.0 | Imperfect RBH |
| CHS    | Migut | Migut_XM_012988738.1 | 843  | Migut.G00630.1          | 597  | 100.0 | Imperfect RBH |
| DFR    | Migut | Migut_XM_012989820.1 | 1230 | Migut.H02531.1          | 1296 | 99.6  | Imperfect RBH |
| F3'H   | Migut | Migut_XM_012982675.1 | 1107 | Migut.O00721.1          | 1032 | 100.0 | Imperfect RBH |
| F3'H   | Migut | Migut_XM_012998441.1 | 1617 | Migut.D01697.1          | 1617 | 100.0 | Perfect RBH   |
| F3H    | Migut | Migut_XM_012980274.1 | 1128 | Migut.C00836.1          | 1128 | 100.0 | Perfect RBH   |
| F3H    | Migut | Migut_XM_012983725.1 | 1071 | Migut.N03161.1          | 1071 | 100.0 | Perfect RBH   |
| ANS    | Nisyl | Nisyl_XM_009777817.1 | 1260 | Nsyl_mRNA_82018_cds     | 1260 | 100.0 | Perfect RBH   |
| CHI    | Nisyl | Nisyl_XM_009805808.1 | 735  | Nsyl_mRNA_10796_cds     | 735  | 100.0 | Perfect RBH   |
| CHS    | Nisyl | Nisyl_XM_009766636.1 | 1170 | Nsyl_mRNA_65311_cds     | 1170 | 100.0 | Perfect RBH   |
| CHS    | Nisyl | Nisyl_XM_009768850.1 | 1296 | Nsyl_mRNA_68684_cds     | 1296 | 100.0 | Perfect RBH   |
| CHS    | Nisyl | Nisyl_XM_009776625.1 | 1170 | Nsyl_mRNA_80210_cds     | 1170 | 100.0 | Perfect RBH   |
| CHS    | Nisyl | Nisyl_XM_009789215.1 | 1173 | Nsyl_mRNA_25875_cds     | 1173 | 100.0 | Perfect RBH   |
| DFR    | Nisyl | -                    | -    | Nsyl_mRNA_14898_cds     | 468  | -     | No RBH        |
| DFR    | Nisyl | Nisyl_XM_009761654.1 | 1146 | Nsyl_mRNA_57456_cds     | 1146 | 100.0 | Perfect RBH   |
| F3'5'H | Nisyl | Nisyl_XM_009790406.1 | 993  | Nsyl_mRNA_27603_cds     | 639  | 100.0 | Imperfect RBH |
| F3'H   | Nisyl | Nisyl_XM_009773108.1 | 1548 | Nsyl_mRNA_74969_cds     | 1056 | 99.9  | cluster BH    |
| F3'H   | Nisyl | Nisyl_XM_009790192.1 | 1545 | Nsyl_mRNA_27286_cds     | 1641 | 100.0 | Imperfect RBH |
| F3H    | Nisyl | Nisyl_XM_009767241.1 | 1110 | Nsyl_mRNA_66230_cds     | 1110 | 100.0 | Perfect RBH   |
| ANS    | Nitab | Nitab_XM_016598316.1 | 1260 | Nitab4.5_0010547g0010.1 | 1125 | 100.0 | Imperfect RBH |
| ANS    | Nitab | Nitab_XM_016645479.1 | 1260 | Nitab4.5_0003274g0110.1 | 1098 | 100.0 | Imperfect RBH |
| CHI    | Nitab | Nitab_XM_016600175.1 | 735  | Nitab4.5_0005313g0010.1 | 645  | 100.0 | cluster BH    |
| CHI    | Nitab | Nitab_XM_016652447.1 | 735  | Nitab4.5_0000027g0470.1 | 735  | 100.0 | Perfect RBH   |
| CHS    | Nitab | -                    | -    | Nitab4.5_0001998g0020.1 | 1023 | -     | No RBH        |
|        |       |                      |      | Nitab4.5_0003185g0100.1 |      |       |               |
| CHS    | Nitab | -                    | -    | split2                  | 1066 | -     | No RBH        |
| CHS    | Nitab | Nitab_XM_016624553.1 | 1296 | Nitab4.5_0010357g0030.1 | 1233 | 97.9  | Imperfect RBH |
| CHS    | Nitab | Nitab_XM_016625162.1 | 1170 | Nitab4.5_0003904g0060.1 | 1107 | 100.0 | Imperfect RBH |
| CHS    | Nitab | Nitab_XM_016634418.1 | 1170 | Nitab4.5_0001066g0070.1 | 1170 | 99.9  | Imperfect RBH |
|        |       |                      |      | Nitab4.5_0003185g0100.1 |      |       |               |
| CHS    | Nitab | Nitab_XM_016638700.1 | 1173 | split1                  | 1101 | 93.2  | Imperfect RBH |
| CHS    | Nitab | Nitab_XM_016638898.1 | 1170 | Nitab4.5_0002920g0060.1 | 762  | 100.0 | Imperfect RBH |
| CHS    | Nitab | Nitab_XM_016653399.1 | 1170 | Nitab4.5_0014110g0010.1 | 1326 | 100.0 | Imperfect RBH |
| CHS    | Nitab | Nitab_XM_016660053.1 | 1173 | Nitab4.5_0006945g0020.1 | 1107 | 100.0 | Imperfect RBH |
| DFR    | Nitab | Nitab_XM_016620104.1 | 1146 | Nitab4.5_0007490g0080.1 | 1014 | 100.0 | Imperfect RBH |
| DFR    | Nitab | Nitab_XM_016622310.1 | 399  | Nitab4.5_0007770g0040.1 | 816  | 100.0 | cluster BH    |
| DFR    | Nitab | Nitab_XM_016626713.1 | 1149 | Nitab4.5_0000178g0360.1 | 1053 | 100.0 | Imperfect RBH |
| F3'5'H | Nitab | Nitab_XM_016597113.1 | 1590 | Nitab4.5_0000173g0310.1 | 1524 | 100.0 | Imperfect RBH |
| F3'H   | Nitab | Nitab_XM_016592903.1 | 1548 | Nitab4.5_0001410g0070.1 | 1641 | 99.2  | Imperfect RBH |
| F3'H   | Nitab | Nitab_XM_016618350.1 | 1548 | Nitab4.5_0001485g0210.1 | 1587 | 99.9  | cluster BH    |
| F3'H   | Nitab | Nitab_XM_016656982.1 | 591  | Nitab4.5_0001410g0020.1 | 1419 | 100.0 | cluster BH    |
| F3H    | Nitab | Nitab_XM_016590223.1 | 1110 | Nitab4.5_0000864g0050.1 | 1110 | 100.0 | Perfect RBH   |
| F3H    | Nitab | Nitab_XM_016630614.1 | 1110 | Nitab4.5_0026775g0010.1 | 1110 | 100.0 | Perfect RBH   |
| ANS    | Nitom | Nitom_XM_009605813.2 | 1260 | Ntom_mRNA_13259_cds     | 1260 | 100.0 | Perfect RBH   |
| CHI    | Nitom | Nitom_XM_009588739.2 | 735  | Ntom_mRNA_7985_cds      | 735  | 100.0 | Perfect RBH   |
| CHS    | Nitom | Nitom_NM_001319862.1 | 1170 | Ntom_mRNA_18483_cds     | 1170 | 100.0 | Perfect RBH   |
| CHS    | Nitom | Nitom_XM_009610476.2 | 1173 | Ntom_mRNA_27571_cds     | 1173 | 100.0 | Perfect RBH   |
| CHS    | Nitom | Nitom_XM_009610477.2 | 1170 | Ntom_mRNA_27574_cds     | 1170 | 100.0 | Perfect RBH   |
| CHS    | Nitom | Nitom_XM_009618342.2 | 1170 | Ntom_mRNA_38569_cds     | 1170 | 100.0 | Perfect RBH   |
| DFR    | Nitom | Nitom_NM_001302522.1 | 1149 | Ntom_mRNA_5184_cds      | 1149 | 99.8  | Imperfect RBH |
| F3'5'H | Nitom | Nitom_XM_009621551.2 | 1524 | Ntom_mRNA_18488_cds     | 1524 | 100.0 | Perfect RBH   |
| F3'H   | Nitom | Nitom_XM_009598972.2 | 1548 | Ntom_mRNA_74743_cds     | 1548 | 100.0 | Perfect RBH   |
| F3H    | Nitom | Nitom_XM_009605261.2 | 1110 | Ntom_mRNA_83308_cds     | 1110 | 100.0 | Perfect RBH   |
| ANS    | Oleur | Oleur_XM_022990294.1 | 1062 | Oeu059047.1             | 1014 | 100.0 | Imperfect RBH |
| CHI    | Oleur | Oleur_KF886191.1     | 750  | Oeu057578.1             | 381  | 100.0 | Imperfect RBH |

|        |       |                      |      |                          |      |       |               |
|--------|-------|----------------------|------|--------------------------|------|-------|---------------|
| CHS    | Oleur | Oleur_XM_022997057.1 | 1173 | Oeu006719.1              | 1173 | 100.0 | Perfect RBH   |
| CHS    | Oleur | Oleur_XM_022997058.1 | 1173 | Oeu006720.1              | 1173 | 100.0 | Perfect RBH   |
| CHS    | Oleur | Oleur_XM_023002817.1 | 1173 | Oeu022348.1              | 1173 | 100.0 | Perfect RBH   |
| CHS    | Oleur | Oleur_XM_023018865.1 | 1170 | Oeu016712.1              | 1170 | 100.0 | Perfect RBH   |
| DFR    | Oleur | Oleur_XM_022999201.1 | 351  | Oeu012314.1              | 351  | 100.0 | Perfect RBH   |
| DFR    | Oleur | Oleur_XM_023039626.1 | 759  | Oeu057948.1              | 561  | 100.0 | Imperfect RBH |
| F3'H   | Oleur | Oleur_XM_023029392.1 | 1644 | -                        | -    | -     | No RBH        |
| F3H    | Oleur | Oleur_XM_023003872.1 | 387  | -                        | -    | -     | No RBH        |
| F3H    | Oleur | Oleur_XM_023028959.1 | 1110 | Oeu046264.1              | 1110 | 100.0 | Perfect RBH   |
| ANS    | Peaxi | -                    | -    | Peaxi162Scf00620g00533.1 | -    | -     | No RBH        |
| CHI    | Peaxi | -                    | -    | Peaxi162Scf00006g00088.1 | -    | -     | No RBH        |
| CHI    | Peaxi | -                    | -    | Peaxi162Scf00038g01957.1 | -    | -     | No RBH        |
| CHS    | Peaxi | -                    | -    | Peaxi162Scf00047g01225.1 | -    | -     | No RBH        |
| CHS    | Peaxi | -                    | -    | Peaxi162Scf00126g01326.1 | -    | -     | No RBH        |
| CHS    | Peaxi | -                    | -    | Peaxi162Scf00164g00313.1 | -    | -     | No RBH        |
| CHS    | Peaxi | -                    | -    | Peaxi162Scf00536g00092.1 | -    | -     | No RBH        |
| CHS    | Peaxi | -                    | -    | Peaxi162Scf00817g00216.1 | -    | -     | No RBH        |
| CHS    | Peaxi | -                    | -    | Peaxi162Scf00830g00016.1 | -    | -     | No RBH        |
| CHS    | Peaxi | -                    | -    | Peaxi162Scf00830g00048.1 | -    | -     | No RBH        |
| CHS    | Peaxi | -                    | -    | Peaxi162Scf00830g00067.1 | -    | -     | No RBH        |
| CHS    | Peaxi | -                    | -    | Peaxi162Scf00938g00001.1 | -    | -     | No RBH        |
| CHS    | Peaxi | -                    | -    | Peaxi162Scf00938g00118.1 | -    | -     | No RBH        |
| CHS    | Peaxi | -                    | -    | Peaxi162Scf08277g00001.1 | -    | -     | No RBH        |
| DFR    | Peaxi | -                    | -    | Peaxi162Scf00366g00630.1 | -    | -     | No RBH        |
| F3'5'H | Peaxi | -                    | -    | Peaxi162Scf00108g00417.1 | -    | -     | No RBH        |
| F3'5'H | Peaxi | -                    | -    | Peaxi162Scf00150g00218.1 | -    | -     | No RBH        |
| F3'H   | Peaxi | -                    | -    | Peaxi162Scf00201g00243.1 | -    | -     | No RBH        |
| F3H    | Peaxi | -                    | -    | Peaxi162Scf00328g01214.1 | -    | -     | No RBH        |
| ANS    | Potri | Potri_XM_002298045.2 | 1083 | Potri.001G113100.1       | 1083 | 100.0 | Perfect RBH   |
| ANS    | Potri | Potri_XM_002304416.3 | 1197 | Potri.003G119100.1       | 1086 | 100.0 | Imperfect RBH |
| CHI    | Potri | Potri_XM_002315222.3 | 672  | Potri.010G213000.1       | 675  | 99.6  | Imperfect RBH |
| CHS    | Potri | Potri_XM_002299161.3 | 1131 | Potri.001G028600.1       | 1131 | 100.0 | Perfect RBH   |
| CHS    | Potri | Potri_XM_002299245.3 | 1176 | Potri.001G051500.1       | 1176 | 100.0 | Perfect RBH   |
| CHS    | Potri | Potri_XM_002299246.3 | 1173 | Potri.001G051600.1       | 1173 | 100.0 | Perfect RBH   |
| CHS    | Potri | Potri_XM_002303783.3 | 1176 | Potri.003G176700.1       | 1176 | 100.0 | Perfect RBH   |
| CHS    | Potri | Potri_XM_002303784.3 | 1176 | Potri.003G176800.1       | 1176 | 100.0 | Perfect RBH   |
| CHS    | Potri | Potri_XM_002303785.3 | 1176 | Potri.003G176900.1       | 1176 | 100.0 | Perfect RBH   |
| CHS    | Potri | Potri_XM_002321045.3 | 1191 | Potri.014G145100.1       | 1206 | 98.8  | Imperfect RBH |
| CHS    | Potri | Potri_XM_006377012.2 | 1188 | Potri.012G138800.1       | 1188 | 100.0 | Perfect RBH   |
| CHS    | Potri | Potri_XM_006383408.2 | 1182 | Potri.005G175200.1       | 1014 | 100.0 | Imperfect RBH |
| DFR    | Potri | Potri_XM_002300723.3 | 1041 | Potri.002G033600.1       | 1041 | 100.0 | Perfect RBH   |
| DFR    | Potri | Potri_XM_006383649.2 | 1131 | Potri.005G229500.1       | 1164 | 100.0 | Imperfect RBH |
| F3'5'H | Potri | Potri_XM_002298428.2 | 1527 | Potri.001G274600.1       | 1527 | 100.0 | Perfect RBH   |
| F3'5'H | Potri | Potri_XM_002313968.3 | 1530 | Potri.009G069100.1       | 1530 | 100.0 | Perfect RBH   |
| F3'H   | Potri | Potri_XM_002319725.3 | 1566 | Potri.013G073300.1       | 1566 | 100.0 | Perfect RBH   |
| F3H    | Potri | -                    | -    | Potri.005G114000.1       | 1158 | -     | No RBH        |
| F3H    | Potri | Potri_XM_006383041.2 | 1092 | Potri.005G113700.1       | 1092 | 100.0 | Perfect RBH   |
| F3H    | Potri | Potri_XM_006383044.2 | 1092 | Potri.005G113900.1       | 1092 | 100.0 | Perfect RBH   |
| ANS    | Seind | Seind_XM_011073005.2 | 1092 | SIN_1026305              | 1092 | 100.0 | Perfect RBH   |
| CHI    | Seind | Seind_XM_011081420.2 | 669  | -                        | -    | -     | No RBH        |
| CHS    | Seind | Seind_XM_011073310.2 | 1161 | -                        | -    | -     | No RBH        |
| CHS    | Seind | Seind_XM_011093097.2 | 1176 | SIN_1018959              | 1176 | 100.0 | Perfect RBH   |
| CHS    | Seind | Seind_XM_011093098.2 | 1176 | SIN_1018960              | 1176 | 100.0 | Perfect RBH   |
| CHS    | Seind | Seind_XM_011093100.2 | 1173 | SIN_1018961              | 1173 | 100.0 | Perfect RBH   |
| DFR    | Seind | Seind_XM_011084901.2 | 1146 | SIN_1022200              | 1047 | 99.9  | Imperfect RBH |
| F3'H   | Seind | Seind_XM_011074564.2 | 1593 | SIN_1017435              | 1536 | 100.0 | Imperfect RBH |
| F3H    | Seind | Seind_XM_011085253.2 | 1101 | SIN_1002345              | 1101 | 100.0 | Perfect RBH   |
| ANS    | Solyc | Solyc_XM_010327136.3 | 1326 | Solyc08g080040.3.1       | 1311 | 100.0 | Imperfect RBH |
| CHI    | Solyc | Solyc_NM_001320711.1 | 681  | Solyc05g010320.3.1       | 615  | 100.0 | Imperfect RBH |
| CHI    | Solyc | Solyc_XM_004239382.4 | 669  | Solyc05g010310.3.1       | 669  | 100.0 | Perfect RBH   |
| CHS    | Solyc | Solyc_NM_001247104.2 | 1170 | Solyc09g091510.3.1       | 1170 | 100.0 | Perfect RBH   |

|        |       |                             |      |                             |      |       |               |
|--------|-------|-----------------------------|------|-----------------------------|------|-------|---------------|
| CHS    | Solyc | <b>Solyc_NM_001247107.2</b> | 1170 | Solyc05g053550.3.1          | 1170 | 100.0 | Perfect RBH   |
| CHS    | Solyc | <b>Solyc_XM_004239850.1</b> | 1179 | Solyc05g053170.3.1          | 1179 | 100.0 | Perfect RBH   |
| CHS    | Solyc | <b>Solyc_XM_010316555.2</b> | 1227 | Solyc12g098090.1.1          | 1317 | 100.0 | Imperfect RBH |
|        |       |                             |      | Solyc06g043120.1.1 +        |      |       |               |
| CHS    | Solyc | <b>Solyc_XM_026031338.1</b> | 1164 | Solyc06g043130.1.1          | 996  | 100.0 | Imperfect RBH |
| DFR    | Solyc | <b>Solyc_XM_010317577.3</b> | 1149 | Solyc02g085020.3.1          | 1149 | 100.0 | Perfect RBH   |
| F3'5'H | Solyc | <b>Solyc_NM_001247911.2</b> | 1599 | Solyc11g066580.2.1          | 1536 | 100.0 | Imperfect RBH |
| F3'H   | Solyc | <b>Solyc_NM_001302915.1</b> | 1545 | Solyc03g115220.3.1          | 1545 | 99.9  | Imperfect RBH |
| F3H    | Solyc | <b>Solyc_NM_001329483.1</b> | 1089 | Solyc02g083860.3.1          | 1089 | 100.0 | Perfect RBH   |
| ANS    | Sopen | <b>Sopen_XM_015229000.1</b> | 1368 | Sopen08g028390.1            | 1368 | 100.0 | Perfect RBH   |
| CHI    | Sopen | <b>Sopen_XM_015219774.1</b> | 669  | Sopen05g006080.1            | 669  | 100.0 | Perfect RBH   |
| CHI    | Sopen | <b>Sopen_XM_015221071.1</b> | 681  | Sopen05g006090.1            | 603  | 100.0 | Imperfect RBH |
| CHS    | Sopen | -                           | -    | <b>Sopen06g013590.1</b>     | 486  | -     | No RBH        |
| CHS    | Sopen | -                           | -    | <b>Sopen12g032910.1</b>     | 1086 | -     | No RBH        |
| CHS    | Sopen | <b>Sopen_XM_015205152.1</b> | 1191 | Sopen12g032900.1            | 1173 | 100.0 | Imperfect RBH |
| CHS    | Sopen | <b>Sopen_XM_015221148.1</b> | 1170 | Sopen05g032070.1            | 1170 | 100.0 | Perfect RBH   |
| CHS    | Sopen | <b>Sopen_XM_015221406.1</b> | 1296 | Sopen05g031680.1            | 981  | 100.0 | Imperfect RBH |
| CHS    | Sopen | <b>Sopen_XM_015232996.1</b> | 1170 | Sopen09g034440.1            | 1170 | 100.0 | Perfect RBH   |
| DFR    | Sopen | <b>Sopen_XM_015210279.1</b> | 1149 | Sopen02g029720.1            | 1149 | 100.0 | Perfect RBH   |
| F3'5'H | Sopen | <b>Sopen_XM_015203537.1</b> | 1536 | Sopen11g026310.1            | 1368 | 100.0 | Imperfect RBH |
| F3'H   | Sopen | <b>Sopen_XM_015215550.1</b> | 1560 | Sopen03g034260.1            | 1368 | 100.0 | Imperfect RBH |
| F3H    | Sopen | <b>Sopen_XM_015211594.1</b> | 1089 | Sopen02g028650.1            | 1089 | 100.0 | Perfect RBH   |
| ANS    | Sotub | <b>Sotub_XM_006358783.2</b> | 1368 | PGSC0003DMT400058554        | 1368 | 100.0 | Perfect RBH   |
| CHI    | Sotub | <b>Sotub_XM_006348548.2</b> | 669  | -                           | -    | -     | No RBH        |
| CHI    | Sotub | <b>Sotub_XM_006348549.2</b> | 765  | -                           | -    | -     | No RBH        |
| CHS    | Sotub | -                           | -    | <b>PGSC0003DMT400022255</b> | 1002 | -     | No RBH        |
| CHS    | Sotub | -                           | -    | <b>PGSC0003DMT400022261</b> | 438  | -     | No RBH        |
| CHS    | Sotub | <b>Sotub_NM_001288367.1</b> | 1170 | PGSC0003DMT400049165        | 1170 | 97.9  | Imperfect RBH |
| CHS    | Sotub | <b>Sotub_NM_001288423.1</b> | 1170 | PGSC0003DMT400076178        | 1170 | 98.3  | Imperfect RBH |
| CHS    | Sotub | <b>Sotub_XM_006349878.2</b> | 1173 | PGSC0003DMT400043447        | 1173 | 100.0 | Perfect RBH   |
| CHS    | Sotub | <b>Sotub_XM_006349914.1</b> | 1215 | PGSC0003DMT400043464        | 1215 | 100.0 | Perfect RBH   |
| CHS    | Sotub | <b>Sotub_XM_006355644.2</b> | 1179 | PGSC0003DMT400069814        | 1179 | 100.0 | Perfect RBH   |
| CHS    | Sotub | <b>Sotub_XM_006367256.2</b> | 1173 | PGSC0003DMT400022254        | 1173 | 100.0 | Perfect RBH   |
| CHS    | Sotub | <b>Sotub_XM_006367257.2</b> | 1179 | PGSC0003DMT400022258        | 1179 | 100.0 | Perfect RBH   |
| CHS    | Sotub | <b>Sotub_XM_015314781.1</b> | 1155 | PGSC0003DMT400076179        | 1140 | 100.0 | Imperfect RBH |
| DFR    | Sotub | <b>Sotub_NM_001288480.1</b> | 1155 | PGSC0003DMT400009287        | 1149 | 100.0 | Imperfect RBH |
| F3'5'H | Sotub | <b>Sotub_XM_015309422.1</b> | 1530 | PGSC0003DMT400001124        | 1344 | 100.0 | Imperfect RBH |
| F3'H   | Sotub | <b>Sotub_XM_006345070.2</b> | 1545 | PGSC0003DMT400063351        | 1368 | 100.0 | Imperfect RBH |
| F3H    | Sotub | <b>Sotub_NM_001288001.1</b> | 1077 | PGSC0003DMT400009175        | 1083 | 98.8  | Imperfect RBH |
| ANS    | Vivin | <b>Vivin_NM_001281218.1</b> | 1068 | GSVIVT01019892001           | 720  | 100.0 | Imperfect RBH |
| CHI    | Vivin | <b>Vivin_NM_001281104.1</b> | 714  | GSVIVT01032619001           | 705  | 99.4  | Imperfect RBH |
| CHS    | Vivin | <b>Vivin_NM_001280950.1</b> | 1182 | -                           | -    | -     | No RBH        |
| CHS    | Vivin | <b>Vivin_NM_001281005.1</b> | 1179 | GSVIVT01010554001           | 1035 | 99.1  | cluster BH    |
| CHS    | Vivin | <b>Vivin_NM_001281010.1</b> | 1179 | -                           | -    | -     | No RBH        |
| CHS    | Vivin | <b>Vivin_NM_001281117.1</b> | 1179 | GSVIVT01010590001           | 1179 | 94.5  | cluster BH    |
| CHS    | Vivin | <b>Vivin_NM_001281135.1</b> | 1365 | -                           | -    | -     | No RBH        |
| CHS    | Vivin | <b>Vivin_XM_002263686.4</b> | 1179 | GSVIVT01010556001           | 897  | 100.0 | cluster BH    |
| CHS    | Vivin | <b>Vivin_XM_002263771.3</b> | 1179 | -                           | -    | -     | No RBH        |
| CHS    | Vivin | <b>Vivin_XM_002263845.4</b> | 1179 | GSVIVT01010561001           | 771  | 100.0 | cluster BH    |
| CHS    | Vivin | <b>Vivin_XM_002263983.3</b> | 1170 | GSVIVT01000521001           | 300  | 100.0 | cluster BH    |
| CHS    | Vivin | <b>Vivin_XM_002264419.4</b> | 1179 | GSVIVT01010565001           | 1095 | 100.0 | Imperfect RBH |
| CHS    | Vivin | <b>Vivin_XM_002264953.4</b> | 1179 | GSVIVT01010572001           | 1284 | 100.0 | Imperfect RBH |
| CHS    | Vivin | <b>Vivin_XM_002265955.3</b> | 1161 | -                           | -    | -     | No RBH        |
| CHS    | Vivin | <b>Vivin_XM_002268720.4</b> | 1179 | -                           | -    | -     | No RBH        |
| CHS    | Vivin | <b>Vivin_XM_002269350.4</b> | 1179 | -                           | -    | -     | No RBH        |
| CHS    | Vivin | <b>Vivin_XM_002269415.4</b> | 1161 | -                           | -    | -     | No RBH        |
| CHS    | Vivin | <b>Vivin_XM_002271335.4</b> | 1179 | GSVIVT01026213001           | 558  | 95.7  | cluster BH    |
| CHS    | Vivin | <b>Vivin_XM_002272093.4</b> | 1179 | GSVIVT01026220001           | 729  | 100.0 | cluster BH    |
| CHS    | Vivin | <b>Vivin_XM_002278318.4</b> | 1179 | GSVIVT01010589001           | 1179 | 99.9  | Imperfect RBH |
| CHS    | Vivin | <b>Vivin_XM_002278447.4</b> | 1179 | -                           | -    | -     | No RBH        |
| CHS    | Vivin | <b>Vivin_XM_003634009.3</b> | 1155 | -                           | -    | -     | No RBH        |
| CHS    | Vivin | <b>Vivin_XM_003634015.3</b> | 1272 | -                           | -    | -     | No RBH        |

|        |       |                             |      |                          |      |       |               |
|--------|-------|-----------------------------|------|--------------------------|------|-------|---------------|
| CHS    | Vivin | <b>Vivin_XM_003634016.3</b> | 1179 | GSVIVT01010563001        | 1053 | 100.0 | Imperfect RBH |
| CHS    | Vivin | <b>Vivin_XM_003634017.3</b> | 1269 | GSVIVT01010570001        | 327  | 91.1  | cluster BH    |
| CHS    | Vivin | <b>Vivin_XM_003634018.3</b> | 1275 | -                        | -    | -     | No RBH        |
| CHS    | Vivin | <b>Vivin_XM_003634019.3</b> | 1179 | GSVIVT01010574001        | 990  | 100.0 | Imperfect RBH |
| CHS    | Vivin | <b>Vivin_XM_003634020.3</b> | 1179 | -                        | -    | -     | No RBH        |
| CHS    | Vivin | <b>Vivin_XM_003634021.3</b> | 1179 | GSVIVT01010583001        | 411  | 96.1  | cluster BH    |
| CHS    | Vivin | <b>Vivin_XM_003634022.3</b> | 1179 | -                        | -    | -     | No RBH        |
| CHS    | Vivin | <b>Vivin_XM_003634023.3</b> | 1179 | GSVIVT01010579001        | 381  | 99.7  | cluster BH    |
| CHS    | Vivin | <b>Vivin_XM_003634024.3</b> | 1179 | GSVIVT01010580001        | 1035 | 100.0 | Imperfect RBH |
| CHS    | Vivin | <b>Vivin_XM_003634025.3</b> | 1179 | GSVIVT01010581001        | 990  | 100.0 | cluster BH    |
| CHS    | Vivin | <b>Vivin_XM_003634026.3</b> | 1179 | GSVIVT01010582001        | 1035 | 100.0 | Imperfect RBH |
| CHS    | Vivin | <b>Vivin_XM_003634027.3</b> | 1179 | GSVIVT01010584001        | 444  | 100.0 | cluster BH    |
| CHS    | Vivin | <b>Vivin_XM_003634028.3</b> | 1179 | GSVIVT01010585001        | 990  | 100.0 | cluster BH    |
| CHS    | Vivin | <b>Vivin_XM_010657617.2</b> | 1101 | -                        | -    | -     | No RBH        |
| CHS    | Vivin | <b>Vivin_XM_010664169.1</b> | 1032 | -                        | -    | -     | No RBH        |
| CHS    | Vivin | <b>Vivin_XM_010664197.2</b> | 1263 | GSVIVT01010568001        | 450  | 100.0 | cluster BH    |
| CHS    | Vivin | <b>Vivin_XM_010664198.2</b> | 1179 | -                        | -    | -     | No RBH        |
| CHS    | Vivin | <b>Vivin_XM_010664202.2</b> | 1179 | -                        | -    | -     | No RBH        |
| CHS    | Vivin | <b>Vivin_XM_019224647.1</b> | 1182 | GSVIVT01032968001        | 1107 | 100.0 | Imperfect RBH |
| CHS    | Vivin | <b>Vivin_XM_019225976.1</b> | 579  | -                        | -    | -     | No RBH        |
| CHS    | Vivin | <b>Vivin_XM_019225977.1</b> | 924  | -                        | -    | -     | No RBH        |
| DFR    | Vivin | -                           | -    | <b>GSVIVT01009742001</b> | 429  | -     | No RBH        |
| DFR    | Vivin | <b>Vivin_XM_010666645.2</b> | 1041 | GSVIVT01009745001        | 1335 | 100.0 | Imperfect RBH |
| DFR    | Vivin | <b>Vivin_XM_019216415.1</b> | 1020 | GSVIVT01009743001        | 1017 | 100.0 | Imperfect RBH |
| DFR    | Vivin | <b>Vivin_XM_019219312.1</b> | 486  | GSVIVT01018927001        | 486  | 100.0 | Perfect RBH   |
| F3'5'H | Vivin | <b>Vivin_NM_001281228.1</b> | 1527 | -                        | -    | -     | No RBH        |
| F3'5'H | Vivin | <b>Vivin_NM_001281235.1</b> | 1527 | -                        | -    | -     | No RBH        |
| F3'5'H | Vivin | <b>Vivin_XM_002271703.3</b> | 1542 | GSVIVT01033633001        | 1659 | 100.0 | Imperfect RBH |
| F3'5'H | Vivin | <b>Vivin_XM_002280626.3</b> | 1530 | -                        | -    | -     | No RBH        |
| F3'5'H | Vivin | <b>Vivin_XM_002280903.4</b> | 1542 | -                        | -    | -     | No RBH        |
| F3'5'H | Vivin | <b>Vivin_XM_003632161.3</b> | 1542 | -                        | -    | -     | No RBH        |
| F3'5'H | Vivin | <b>Vivin_XM_003632164.3</b> | 1527 | -                        | -    | -     | No RBH        |
| F3'5'H | Vivin | <b>Vivin_XM_003632194.3</b> | 1542 | -                        | -    | -     | No RBH        |
| F3'5'H | Vivin | <b>Vivin_XM_010653221.2</b> | 1527 | -                        | -    | -     | No RBH        |
| F3'5'H | Vivin | <b>Vivin_XM_010653223.2</b> | 1527 | -                        | -    | -     | No RBH        |
| F3'5'H | Vivin | <b>Vivin_XM_010653225.2</b> | 1527 | -                        | -    | -     | No RBH        |
| F3'5'H | Vivin | <b>Vivin_XM_010653372.1</b> | 1215 | -                        | -    | -     | No RBH        |
| F3'5'H | Vivin | <b>Vivin_XM_019220452.1</b> | 1329 | -                        | -    | -     | No RBH        |
| F3'5'H | Vivin | <b>Vivin_XM_019220476.1</b> | 486  | -                        | -    | -     | No RBH        |
| F3'H   | Vivin | <b>Vivin_NM_001280987.1</b> | 1530 | GSVIVT01007878001        | 1356 | 99.4  | Imperfect RBH |
| F3'H   | Vivin | <b>Vivin_XM_002284115.4</b> | 1530 | GSVIVT01007877001        | 588  | 99.5  | cluster BH    |
| F3H    | Vivin | <b>Vivin_NM_001281105.1</b> | 1092 | GSVIVT01018781001        | 687  | 100.0 | Imperfect RBH |
| F3H    | Vivin | <b>Vivin_XM_002275527.3</b> | 1077 | GSVIVT01009907001        | 765  | 100.0 | Imperfect RBH |
| F3H    | Vivin | <b>Vivin_XM_010650732.2</b> | 1101 | GSVIVT01018780001        | 1320 | 100.0 | Imperfect RBH |

Annotated genes listed in bold were included in phylogenetic analyses



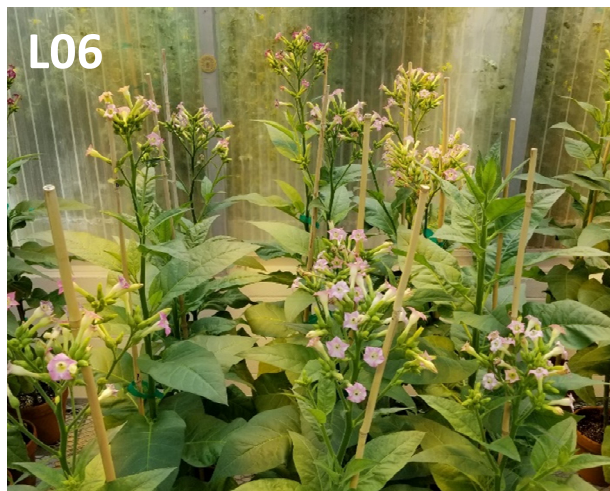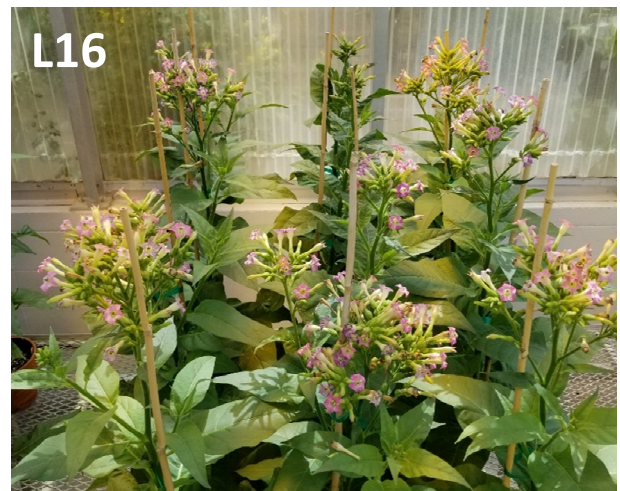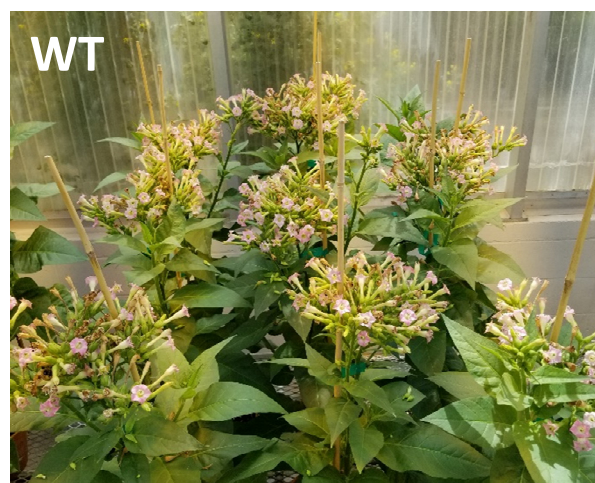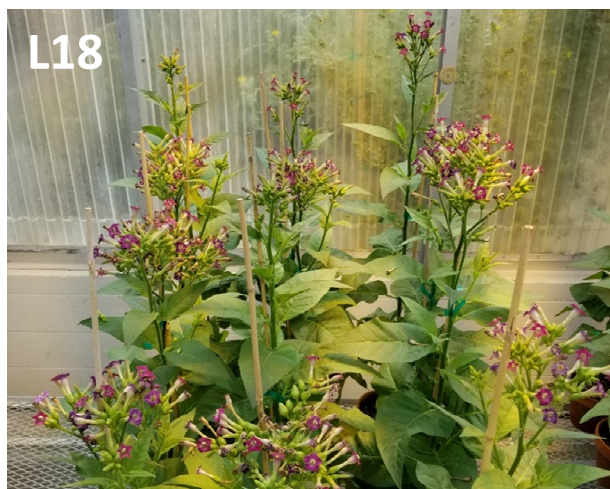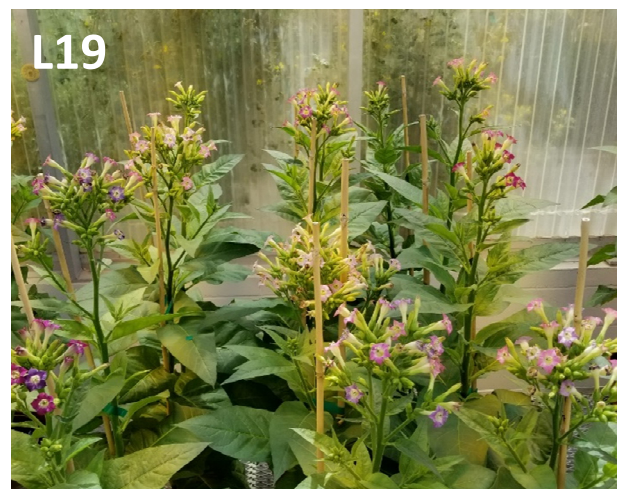

**Fig S1.** Populations of  $T_1$  generation lines in comparison to WT.
